# Supplementary material
Source: HighWire-hosted journal article supplement (https://bmjopensem.bmj.com/content/5/1/e000572)
Supplement: inline-supplementary-material-1 [file inline-supplementary-material-1.docx]

## Supplementary table 1. Comparison of total population with survey respondents by specialty

| **Specialty** | **RCPI members (%)** | **Survey participants (%)** |
| --- | --- | --- |
| Anaesthesia | 0.3 | 0.8 |
| Cardiology | 4.7 | 5.5 |
| Community health | 0.0 | 0.2 |
| Clinical Genetics | 0.1 | 0.3 |
| Clinical Pharmacology & Therapeutics | 0.4 | 0.5 |
| Dermatology | 1.9 | 2.0 |
| Emergency Medicine | 0.4 | 1.0 |
| Endocrinology & Diabetes Mellitus | 2.9 | 2.4 |
| Gastroenterology | 3.4 | 4.7 |
| General (Internal) Medicine | 20.9 | 8.1 |
| General Practice | 1.8 | 10.3 |
| General Surgery | 0.2 | 0.0 |
| Genito-Urinary Medicine | 0.2 | 1 |
| Geriatric Medicine | 3.2 | 4 |
| Haematologist | 2.7 | 1.9 |
| Histopathology | 4.8 | 0.0 |
| Immunology (Clinical & Laboratory) | 0.2 | 0.4 |
| Infectious Diseases | 1.0 | 1.5 |
| Intern | 1.2 | 0.0 |
| Medical Oncology | 2.2 | 2.7 |
| Microbiology | 2.0 | 1.0 |
| Nephrology | 1.5 | 2.0 |
| Neurology | 2.1 | 2.7 |
| Obstetrics & Gynaecology | 10.6 | 9.2 |
| Occupational Medicine | 2.9 | 3.5 |
| Ophthalmology | 0.0 | 0.2 |
| Paediatrics | 13.1 | 12.8 |
| Pathology | 0.0 | 1.9 |
| Palliative Medicine | 1.2 | 2.0 |
| Psychiatry | 1.2 | 2.2 |
| Public Health Medicine | 4.3 | 2.7 |
| Radiation Oncology | 0.1 | 0.2 |
| Radiology | 1.0 | 2.4 |
| Rehabilitation Medicine | 0.4 | 0.3 |
| Respiratory Medicine | 2.5 | 4.5 |
| Rheumatology | 1.7 | 3.0 |
| Sports medicine | 0.0 | 0.4 |
| Prefer not to answer | 0.0 | 1.5 |
| **Total** | **100.0** | **100.0** |
